1 **Associations between multiple immune-response-related**  
2 **proteins and neonatal infection: a proximity extension assay**  
3 **based proteomic study in cord plasma of twins**

4

5 **Ruoqing Chen<sup>1,2,a</sup>, Weiri Tan<sup>1,a</sup>, Yeqi Zheng<sup>1</sup>, Feng Wu<sup>1</sup>, Hui Liang<sup>3</sup>, Youmei**  
6 **Chen<sup>3</sup>, Xian Liu<sup>3</sup>, Fang Fang<sup>2</sup>, Rui Zhang<sup>3</sup>, Quanfu Zhang<sup>3,b</sup>, Xu Chen<sup>5,b</sup>**

7

8 <sup>1</sup> School of Public Health (Shenzhen), Sun Yat-sen University, Shenzhen, China

9 <sup>2</sup> Institute of Environmental Medicine, Karolinska Institute, Stockholm, Sweden

10 <sup>3</sup> Baoan Women's and Children's Hospital, Shenzhen University, Shenzhen, China

11 <sup>a</sup> R. C. and W. T. contributed equally to this work as co-first authors.

12 <sup>b</sup> Q. Z. and X. C. contributed equally to this work as co-corresponding authors.

13

14 **Correspondence:** Xu Chen ([chuanxuchen@outlook.com](mailto:chuanxuchen@outlook.com)) and Quanfu Zhang  
15 ([quanfuzhang1218@163.com](mailto:quanfuzhang1218@163.com)), Baoan Women's and Children's Hospital, Shenzhen  
16 University. #56 Yu Lv Road, Baoan District, Shenzhen, Guangdong 518100, China.

17

18 **Key point (40 words):**

19 In this nested case-control study, 92 immune-response-related proteins were measured  
20 in cord plasma by proximity extension assay. A higher level of ITGA11 was  
21 associated with a higher risk of neonatal infection, in the analyses of all twins and  
22 discordant twins.

23

24 **Word limit:** 2742 words (excluding the abstract and references).

25 **Abstract** (245 words)

26 **Background.** Given their immature immune system, neonates are highly susceptible  
27 to infection, a major cause of neonatal death. However, associations between  
28 immune-response-related proteins and risk of neonatal infection have yet been  
29 systematically investigated.

30 **Methods.** We conducted a nested case-control study of 149 twins (60 cases and 89  
31 controls, including 34 pairs of discordant twins), within the Shenzhen Baoan Birth  
32 and Twin (SZBBTwin) cohort. Using proximity extension assay of Olink Proteomics,  
33 92 immune-response-related proteins were measured in samples of cord plasma. All  
34 twins were followed for a diagnosis of infection from birth until 27 days of age.  
35 Wilcoxon rank-sum test was used to determine differentially expressed proteins  
36 (DEPs), and multivariable logistic regression was used to assess the associations of  
37 the levels of proteins with neonatal infection. The receiver operating characteristic  
38 curve was plotted to evaluate the predictive performance of DEPs. Enrichment  
39 analysis was performed to annotate potential functions and pathways of DEPs.

40 **Results.** Five DEPs (ITGA11, FCRL6, DDX58, SH2D1A, and EDAR) were  
41 identified for neonatal infection. A higher cord plasma level of integrin alpha 11  
42 (ITGA11) was associated with a higher risk of neonatal infection in both the analyses  
43 of all twins and discordant twins. The area under the curve achieved 0.835 for the five  
44 DEPs. The identified DEPs were mainly involved in immune function and protein  
45 binding, and most of them were enriched in the nuclear factor kappa-B pathway.

46 **Conclusion.** Multiple immune-response-related proteins in cord plasma, particularly  
47 ITGA11, are associated with the risk of neonatal infection.

48

49 **Keywords.** Neonatal infection; Proteomics; Immune response protein; Cord plasma;  
50 Twin study

51

52 **BACKGROUND**

53 According to the World Health Organization (WHO), neonatal infection causes over  
54 550,000 neonatal deaths annually [1], accounting for approximately 23% of the  
55 overall neonatal mortality worldwide. Among the 93,400 neonatal deaths in China  
56 during 2015, about 8.5% were due to infections such as pneumonia, sepsis, and  
57 meningitis [2]. Many systems in neonates are still under development and maturation;  
58 the immature immune system, particularly, makes them highly vulnerable to  
59 pathogens, leading to infections [3].

60

61 Maternally acquired antibodies, such as IgG transmitted through placenta and sIgA in  
62 breast milk, are one of the important resources in the immune system to fight against  
63 infections for the neonates [4]. In addition, proteins related to immune response, such  
64 as interleukins and cytokines, are associated with resistance to neonatal infection [5].  
65 However, immune-response-related proteins in relation to neonatal infection have not  
66 been comprehensively investigated, primarily due to the limitations of traditional  
67 techniques to quantify levels of proteins [6]. Insufficient consideration of confounding  
68 factors that may impact both protein levels and risk of infection in the neonatal period  
69 is another reason [7]. The twin design could control for shared genetic and  
70 environmental confounding factors and thus may enhance the strength of causal  
71 evidence in omics research [8].

72

73 Utilizing the dual recognition and DNA-coupled technique, the proximity extension  
74 assay (PEA) from Olink Proteomics platform could simultaneously measure a broad  
75 range of proteins with a small volume of sample [9]. It therefore serves a  
76 high-throughput proteomic tool without the antibody cross-reactivity that would occur  
77 in conventional protein assays [10].

78

79 In this nested case-control study, we aimed to investigate the associations of cord  
80 plasma levels of 92 immune-response-related proteins with risk of neonatal infection  
81 among twins. We also intended to assess the predictive performance of differentially

82 expressed proteins (DEPs), as well as their potential function and pathways for  
83 neonatal infection.

84

85

## 86 **METHODS**

### 87 **Study design and participants**

88 This is a nested case-control study embedded in the Shenzhen Baoan Birth & Twin  
89 (SZBBTwin) cohort, which was initiated in the Baoan Women's and Children's  
90 Hospital, Shenzhen, China, since May 5<sup>th</sup>, 2020. In the SZBBTwin cohort, women  
91 who had their antenatal registration and delivered through cesarean section in Baoan  
92 Women's and Children's Hospital were invited, together with their neonates.

93 Exclusion criteria were women with a history of infection with hepatitis B, human  
94 immunodeficiency virus, toxoplasma, rubella virus, cytomegalovirus, herpes simplex  
95 virus, and other infections, as well as women who delivered at a gestational age of  
96 less than 28 weeks or on weekends. Informed consent was given by the mother before  
97 delivery. The Ethics Committee of Baoan Women's and Children's Hospital has  
98 approved this study (LLSC-2021-04-01-12-KS) and the SZBBTwin cohort  
99 (LLSC2019-02-18).

100

101 Until February 6<sup>th</sup>, 2023, 352 pairs of twin neonates (N=704) had been recruited.  
102 Biological samples were collected at delivery, including maternal blood, cord blood,  
103 amniotic fluid, tissues of umbilical cord, and placenta. Four neonates without cord  
104 blood samples were excluded from subsequent measurements and analyses (Figure 1).

105 We followed the twin neonates until 27 days of age, during which we collected all  
106 medical records of hospitalizations, outpatient visits, and emergencies from the  
107 hospital information system (HIS) of Baoan Women's and Children's Hospital.

108

109 Cases were defined as twin neonates with a clinical diagnosis of infection during 0-27  
110 days after birth. Clinical diagnosis of neonatal infection was determined using  
111 diagnostic records in HIS, as well as medical and laboratory tests including blood

112 culture and sputum culture. Discordant twin pairs were defined as pairs in which one  
113 twin had neonatal infection, and the other twin had not. A total of 60 cases (including  
114 34 from discordant twin pairs) were identified in the present study, including  
115 pneumonia (n=27), acute upper respiratory tract infection (n=11), sepsis (n=5),  
116 neonatal conjunctivitis (n=5), coronavirus disease 2019 (COVID-19, n=2), peritonitis  
117 (n=2), bronchopneumonia (n=1), acute bronchitis (n=1), meningitis (n=1), perianal  
118 abscess (n=1), and other infections (n=4).

119

120 Controls were defined as twin neonates who had no infection during 0-27 days after  
121 birth. Finally, 99 controls were matched to 60 cases using two strategies (Figure 1): 1)  
122 within twin pairs, i.e., discordant twin pairs (n=34); 2) controls and cases other than  
123 discordant twin pairs were of the same sex and age (dates of birth less than 30 days  
124 apart) (n=65).

125

### 126 **Immune-response-related proteins measurements**

127 Ten milliliters of cord blood were collected with syringes and encapsulated into  
128 EDTA vacuum tubes. After centrifugation (4000g) for 15 minutes, the plasma was  
129 dispensed into cryotubes and stored at -80°C until measurements. The entire  
130 procedure was completed within six hours.

131

132 Using 1µl of each sample of cord plasma, the levels of 92 immune-response-related  
133 proteins were measured using PEA (Immune Response Panel, Olink Proteomics AB,  
134 Uppsala, Sweden). The assay was performed according to the manufacturer's  
135 instructions and protocol [11], which mainly included four steps: immuno-reaction,  
136 extension, pre-amplification, and quantitative real-time polymerase chain reaction.  
137 The protein levels measured from PEA were presented as normalized protein  
138 expression (NPX) values on a log<sub>2</sub>-scale, with a higher value corresponding to a  
139 higher protein expression. All validation data of the assay (such as detection limits,  
140 intra- and inter-assay precision data, etc.) are available on the website of Olink.

141

142 Two batches of PEA were performed in our study. Ten plasma samples (including five  
143 from cases and five from controls) were used as bridging samples from both batches.  
144 Data from two batches were merged and normalized using the R package  
145 *OlinkAnalyze* (version 2.0.6). Negative NPX values were retained, and missing NPX  
146 values were excluded from the analysis. According to the official recommendation, a  
147 warning sample was defined if its principal component (PC) value was 2.5 standard  
148 deviations (SD) away from the mean of PC1 and 4 SD away from the mean of PC2.  
149 Finally, 10 warning samples were excluded, resulting in 60 cases and 89 controls in  
150 our final analysis (Figure 1).

151

### 152 **Confounding factors**

153 Maternal and neonatal characteristics might serve as potential confounding factors for  
154 the studied associations. We therefore collected information from the HIS, including  
155 maternal age at child's birth [12], gravidity [13], educational level [14], gestational  
156 age [15], vaginal bleeding in early pregnancy [16], pre-pregnancy body mass index  
157 (BMI) [17], mode of conception [18], complications included diabetes, hypertension  
158 and autoimmune diseases [19–21], as well as sex [22] and birth weight [23] of the  
159 neonates.

160

### 161 **Statistical analysis**

162 Continuous variables of prenatal and delivery characteristics were shown as mean and  
163 SD, and differences between groups were compared using independent samples t-test  
164 or paired samples t-test. Categorical variables were shown as frequencies and  
165 proportions, and differences between groups were analyzed using Pearson's  
166 Chi-squared test or Fisher's exact test. Correlation heatmap and cluster heatmap were  
167 used to assess the correlations between different immune-response-related proteins in  
168 all twins.

169

170 Levels of the immune-response-related proteins between cases and controls were  
171 compared using Wilcoxon rank-sum test for all twins, and Wilcoxon signed-rank test

172 for discordant twin pairs. Proteins with statistically significantly different levels  
173 ( $P < 0.05$ ) among all twins were considered as DEPs. The fold change (FC) values  
174 were calculated as the ratio of the means of the NPX values between cases and  
175 controls, and the converted FC values and the  $P$  values from Wilcoxon rank-sum test  
176 were used to draw the volcano plot. Logistic regression was used to assess the  
177 associations between proteins and risk of neonatal infection in all twins, and  
178 conditional logistic regression in discordant twins. Regression models were adjusted  
179 for the aforementioned confounding factors, from which the predictive performance  
180 was evaluated by the receiver operating characteristic (ROC) curves.

181

### 182 **Enrichment analysis**

183 Metascape was used to perform the enrichment analysis [24], which annotates  
184 potential functions, pathways, and interactions for the DEPs, by integrating Gene  
185 Ontology (GO) and Kyoto Encyclopedia of Genes and Genomes (KEGG). Terms of  
186 enrichment associated with more proteins have smaller  $P$  values. Term pairs with  
187 Kappa similarity exceeding 0.3 are shown as network plots, enabling the visualization  
188 of relationships between terms of enrichment.

189

190 SAS version 9.4 (SAS Institute, Cary, NC, USA) was used for data management, and  
191 R version 4.2.2 (R Foundation for Statistical Computing, Vienna, Austria) was used  
192 for statistical analysis and plotting.

193

194

## 195 **RESULTS**

196 Among all twins in the nested case-control study ( $n=149$ ), the baseline characteristics  
197 showed no difference between cases and controls, except that maternal pre-pregnancy  
198 BMI was higher in cases than in controls. Within 34 pairs of discordant twins, cases  
199 had higher birth weights than controls (Table 1). The baseline characteristics were not  
200 different between all twins and discordant twin pairs (Supplementary Table 1).

201

202 In all twins, cases had higher levels of integrin alpha-11 (ITGA11) and Fc  
203 receptor-like 6 (FCRL6), and lower levels of DEAD (Asp-Glu-Ala-Asp) box  
204 polypeptide 58 (DDX58), SH2 domain-containing 1A (SH2D1A) and ectodysplasin-A  
205 receptor (EDAR), than controls (Figure 2, Supplementary Figure 1). As shown in  
206 Supplementary Figure 2, SH2D1A and DDX58 were close to each other on the cluster  
207 branches. The correlation heatmap showed a medium to high correlation between  
208 DDX58, SH2D1A and EDARs, but a low correlation between ITGA11 and FCRL6  
209 (Supplementary Figure 3). In the discordant twins, cases had lower levels of  
210 N-acetylgalactosaminyltransferase 3 (GALNT3), lymphocyte-activation gene 3  
211 (LAG3), and parathyroid hormone receptor (PTH1R) than their co-twins without  
212 infection (Supplementary Table 2).

213

214 After multivariable adjustment (Figure 3A, Supplementary Table 3), higher levels of  
215 ITGA11, FCRL6, mannose associated serine protease 1 (MASP1), and contactin  
216 associated protein-like protein 2 (CNTNAP2) were associated with a higher risk of  
217 neonatal infection, whereas inverse associations were observed for SH2D1A, zinc  
218 finger and BTB domain-containing 16 (ZBTB16), and sprouty homolog 2 (SPRY2).  
219 In the analysis of discordant twin pairs, only higher levels of ITGA11 and proprotein  
220 convertase subtilisin/kexin type 4 and serine/arginine-rich splicing factor 1-interacting  
221 protein (PSIP1) were associated with a higher risk of neonatal infection (Figure 3B).

222

223 The five DEPs (ITGA11, FCRL6, DDX58, SH2D1A, and EDAR) were included one  
224 at a time in logistic regression to plot a ROC curve. After the adjustment for  
225 confounding factors, the cord plasma levels of the DEPs could predict the probability  
226 of neonatal infection with medium accuracy (Figure 4), with the area under curve  
227 (AUC) between 0.782 and 0.805 ( $AUC_{ITGA11} = 0.796$ ,  $AUC_{FCRL6} = 0.787$ ,  $AUC_{DDX58} =$   
228  $0.779$ ,  $AUC_{SH2D1A} = 0.805$ ,  $AUC_{EDAR} = 0.782$ , all  $P < 0.001$ ). Furthermore, when the  
229 five DEPS were included simultaneously, the regression model showed a specificity  
230 of 80.9% and a sensitivity of 75.0% ( $AUC = 0.835$ ,  $P < 0.001$ ).

231



232 As shown in the GO enrichment analysis, the five DEPs were mainly enriched in the  
233 regulation of leukocyte mediated immunity, integrin alpha11-beta1 complex,  
234 regulation of type III interferon production, tube lumen cavitation, and major  
235 histocompatibility complex (MHC) class II protein binding (Figure 5A). The network  
236 plot (Figure 5B) showed that leukocyte mediated immunity was associated with the  
237 regulation of type III interferon production, and integrin alpha11-beta1 complex was  
238 associated with MHC class II protein binding (Kappa similarity > 0.3). The KEGG  
239 enrichment analysis indicated that the five DEPs were mainly associated with the  
240 nuclear factor kappa-B (NF-κB) signaling pathway (Figure 5C).

241

242

## 243 **DISCUSSION**

244 In this nested case-control study of twins, we found that five immune-response-related  
245 proteins in cord plasma, particularly ITGA11, were associated with neonatal infection.  
246 These five proteins are mainly involved in immune regulation and protein binding,  
247 and most of them are enriched in the nuclear factor kappa-B pathway.

248

249 Although several immune-response-related proteins have been reported in relation to  
250 infection in cell experiments or animal studies [25,26], studies in human neonates are  
251 scarce, let alone twins. In our study, cord plasma levels of DDX58, EDAR and  
252 SH2D1A were less expressed in cases than controls in all twins. DDX58, an innate  
253 immune receptor, has been connected to virus recognition [27] and the initiation of  
254 innate immunity and inflammatory responses [28]. As a member of the tumor necrosis  
255 factor receptor super-family, EDAR may resist infection and promote inflammation  
256 responses by mediating the activation of the NF-κB pathway [29,30]. Previous studies  
257 showed that deficiency in SH2D1A was associated with immunodeficiency and might  
258 lead to hypogammaglobulinemia and B-cell lymphoma [31,32], corroborating our  
259 finding that a lower level of SH2D1A was associated with a higher risk of neonatal  
260 infection in all twins. We also observed that a higher level of FCRL6 was associated  
261 with a higher risk of neonatal infection. As a receptor for MHC II, FCRL6 could

262 regulate humoral responses and may act as a biomarker for chronic immune-related  
263 diseases [33]. FCRL6 might also be associated with the reactivation of  
264 cytomegalovirus [34].

265

266 The five DEPs identified for neonatal infection are enriched in the NF- $\kappa$ B pathway,  
267 which may also be one of the main pathways associated with neonatal infection.

268 DDX58 is stimulated during the activation of the non-canonical NF- $\kappa$ B pathway  
269 related to RNA viruses infection [35]. SH2D1A can activate NF- $\kappa$ B, which may be  
270 important for the host to properly defend against Epstein-Barr virus invasion [36].

271 The NF- $\kappa$ B pathway participates in the development of various systems in the embryo,  
272 and abnormalities in the function of NF- $\kappa$ B pathway can disrupt normal  
273 developmental processes or host immune defenses [37].

274

275 In the present study, a higher level of ITGA11 was associated with a higher risk of  
276 neonatal infection in both the analyses of all twins and discordant twin pairs. ITGA11  
277 is a member of the integrin receptor family, which are dimers composed of  $\alpha$  and  $\beta$   
278 subunits and involve in cell-cell or cell-extracellular matrix adhesion. Some studies  
279 have reported an association of ITGA11 with infections. In an animal study, ITGA11  
280 was associated with co-infection of avian leukosis virus subgroup J and  
281 reticuloendotheliosis virus in chicken embryos, and the study also suggests that  
282 ITGA11 was enriched in the pathways of virus-vector interaction, bio-adhesion, and  
283 immune responses at the protein level [38]. Similarly, our results of enrichment  
284 analysis also indicated that ITGA11 was relevant to protein binding. Binding to cells  
285 via integrins might be the infection mechanism employed by many pathogens. For  
286 instance, the Arg-Gly-Asp (RGD) tripeptide motif on the envelope of adenoviruses  
287 and herpesviruses, which plays a pivotal role in viral infection, acts as a recognition  
288 motif for integrins, including ITGA11 [39].

289

290 Our study identified several potential protein markers for understanding the immunity  
291 to infections among neonates. Pair design of discordant twins was used to control for

292 the effect of shared environmental and genetic confounders, improving the validity of  
293 the results, which might also explain the inconsistency in the results of multivariable  
294 logistic regressions for all twins and discordant twins [40]. Nested case-control study  
295 with a clear chronological order also provides good control of selection and recall bias.  
296 In addition, a powerful proteomics technique, i.e., PEA with high-throughput,  
297 high-precision, and low-interference, allowed a comprehensive protein analysis.

298

299 Our study also has several limitations. We neither performed analyses for different  
300 types of neonatal infection (e.g., bacterial, viral, etc.), nor did we subdivide discordant  
301 twins into monozygotes and dizygotes, owing to the small sample. We had not  
302 performed functional validation due to financial constraints and the scarcity of cord  
303 blood of twin neonates. In addition, we analyzed a fixed panel of 92  
304 immune-response-related proteins, and there might be other potentially relevant  
305 proteins that had not been included.

306

307 In conclusion, five immune-response-related proteins were identified as DEPs for  
308 neonatal infection, which might be enriched in the NF- $\kappa$ B pathway. A higher level of  
309 ITGA11 was associated with a higher risk of neonatal infection in all twins and  
310 discordant twin pairs. The potential role of ITGA11 in the clinical practice of neonatal  
311 infection, as well as the molecular mechanisms require further investigation.

312

313

#### 314 **ACKNOWLEDGEMENTS**

315 The authors would like to thank Dr. Likuan Xiong, Dr. Bin Liu, Dr. Yuanfang Zhu,  
316 and Dr. Xu Chen (Former president) in Shenzhen Baoan Women's and Children's  
317 Hospital for the construction of the SZBBTwin cohort.

318

#### 319 **Author contributions**

320 Ruoqing Chen and Xu Chen conceptualized the study. Weiri Tan, Yeqi Zheng, and  
321 Feng Wu retrieved and organized data. Hui Liang performed the assays. Xian Liu,

322 Youmei Chen, Rui Zhang, and Quanfu Zhang recruited the participants and collected  
323 the samples. Weiri Tan performed the data collection, processing, and analyses, and  
324 wrote the initial draft of the manuscript. Ruoqing Chen, Fang Fang, and Xu Chen  
325 were involved in revising the study and manuscript. All authors have read and agreed  
326 to the final version of the manuscript.

327

### 328 **Funding sources**

329 This study was funded by the Fundamental Research Funds for the Central  
330 Universities, Sun Yat-sen University (R. Chen, Grant No.: 22qntd4311), the 100  
331 Talents Plan Foundation of Sun Yat-sen University (R. Chen, Grant No.:  
332 58000-12230022), the Guangdong Basic and Applied Basic Research Fund (R. Chen,  
333 Grant No.: 2022A1515110417), the Science, Technology and Innovation Council of  
334 Shenzhen (X. Chen, Grant No.: JCYJ20190809152801661), and the National Natural  
335 Science Foundation of China (X. Chen, Grant No.: 82001652).

336

### 337 **Conflict of interest**

338 The authors declare no conflict of interest.

339

### 340 **Supplementary Data**

341 Supplementary materials are available online.

342

343 **References**

- 344 1. World Health Organization. Newborn infections. Available at:  
345 [https://www.who.int/teams/maternal-newborn-child-adolescent-health-and-ageing/newborn-](https://www.who.int/teams/maternal-newborn-child-adolescent-health-and-ageing/newborn-health/newborn-infections)  
346 [health/newborn-infections](https://www.who.int/teams/maternal-newborn-child-adolescent-health-and-ageing/newborn-health/newborn-infections). Accessed 5 November 2022.
- 347 2. He C, Liu L, Chu Y, et al. National and subnational all-cause and cause-specific child  
348 mortality in China, 1996–2015: a systematic analysis with implications for the sustainable  
349 development goals. *Lancet Glob Health* **2017**; 5:e186–e197.
- 350 3. Cinicola B, Conti MG, Terrin G, et al. The protective role of maternal immunization in early  
351 life. *Front Pediatr* **2021**; 9:638871.
- 352 4. Victora CG, Bahl R, Barros AJD, et al. Breastfeeding in the 21st century: epidemiology,  
353 mechanisms, and lifelong effect. *Lancet* **2016**; 387:475–490.
- 354 5. Green EA, Garrick SP, Peterson B, et al. The role of the interleukin-1 family in  
355 complications of prematurity. *Int J Mol Sci* **2023**; 24:2795.
- 356 6. Pla-Roca M, Leulmi RF, Tourekhanova S, et al. Antibody colocalization microarray: a  
357 scalable technology for multiplex protein analysis in complex samples. *Mol Cell Proteomics*  
358 **2012**; 11:M111.011460.
- 359 7. Sly PD, Trottier B, Ikeda-Araki A, Vilcins D. Environmental impacts on infectious disease:  
360 a literature view of epidemiological evidence. *Ann Glob Health* 88:91.
- 361 8. Hasegawa M, Taniguchi J, Ueda H, Watanabe M. Twin study: genetic and epigenetic factors  
362 affecting circulating adiponectin levels. *J Clin Endocrinol Metab* **2023**; 108:144–154.
- 363 9. Coral DE, Franks PW. Proteogenomic mapping sets stage for precision medicine. *Nat Metab*  
364 **2023**; 5:366–367.
- 365 10. Petrer A, von Toerne C, Behler J, et al. Multiplatform approach for plasma proteomics:  
366 complementarity of Olink proximity extension assay technology to mass spectrometry-based  
367 protein profiling. *J Proteome Res* **2021**; 20:751–762.
- 368 11. Assarsson E, Lundberg M, Holmquist G, et al. Homogenous 96-plex PEA immunoassay  
369 exhibiting high sensitivity, specificity, and excellent scalability. *PLoS One* **2014**; 9:e95192.
- 370 12. Attali E, Yogev Y. The impact of advanced maternal age on pregnancy outcome. *Best Pract*  
371 *Res Clin Obstet Gynaecol* **2021**; 70:2–9.
- 372 13. Lao TT, Sahota DS. Pregnancy and maternal chronic hepatitis B infection—Evidence of  
373 reproductive advantage? *Am J Reprod Immunol* **2017**; 77:e12667.
- 374 14. Noghanibehambari H, Salari M, Tavassoli N. Maternal human capital and infants' health  
375 outcomes: Evidence from minimum dropout age policies in the US. *SSM Popul Health* **2022**;  
376 19:101163.
- 377 15. Miller JE, Hammond GC, Strunk T, et al. Association of gestational age and growth  
378 measures at birth with infection-related admissions to hospital throughout childhood: a  
379 population-based, data-linkage study from Western Australia. *Lancet Infect Dis* **2016**;  
380 16:952–961.
- 381 16. McPherson JA, Odibo AO, Shanks AL, Roehl KA, Macones GA, Cahill AG. Adverse  
382 outcomes in twin pregnancies complicated by early vaginal bleeding. *Am J Obstet Gynecol*  
383 **2013**; 208:56.e1-56.e5.
- 384 17. Rajappan A, Pearce A, Inskip HM, et al. Maternal body mass index: relation with infant  
385 respiratory symptoms and infections. *Pediatr Pulmonol* **2017**; 52:1291–1299.
- 386 18. Fauser BCJM, Devroey P, Diedrich K, et al. Health outcomes of children born after

- 387 IVF/ICSI: a review of current expert opinion and literature. *Reprod Biomed Online* **2014**;  
388 28:162–182.
- 389 19. De Carolis S, Moresi S, Rizzo F, et al. Autoimmunity in obstetrics and autoimmune diseases  
390 in pregnancy. *Best Pract Res Clin Obstet Gynaecol* **2019**; 60:66–76.
- 391 20. Bello NA, Zhou H, Cheetham TC, et al. Prevalence of hypertension among pregnant women  
392 when using the 2017 American College of Cardiology/American Heart Association blood  
393 pressure guidelines and association with maternal and fetal outcomes. *JAMA Netw Open*  
394 **2021**; 4:e213808.
- 395 21. Ye W, Luo C, Huang J, Li C, Liu Z, Liu F. Gestational diabetes mellitus and adverse  
396 pregnancy outcomes: systematic review and meta-analysis. *BMJ* **2022**; 377:e067946.
- 397 22. Baines KJ, West RC. Sex differences in innate and adaptive immunity impact fetal, placental,  
398 and maternal health. *Biol Reprod* **2023**; 109:256–270.
- 399 23. Sahu P, Raj Stanly EA, Simon Lewis LE, Prabhu K, Rao M, Kunhikatta V. Prediction  
400 modelling in the early detection of neonatal sepsis. *World J Pediatr* **2022**; 18:160–175.
- 401 24. Zhou Y, Zhou B, Pache L, et al. Metascape provides a biologist-oriented resource for the  
402 analysis of systems-level datasets. *Nat Commun* **2019**; 10:1523.
- 403 25. Liu G, Lu Y, Thulasi Raman SN, et al. Nuclear-resident RIG-I senses viral replication  
404 inducing antiviral immunity. *Nat Commun* **2018**; 9:3199.
- 405 26. Leomil Coelho LF, Mota BEF, Sales PCM, et al. Integrin alpha 11 is a novel type I  
406 interferon stimulated gene. *Cytokine* **2006**; 33:352–361.
- 407 27. Sharma A, Kontodimas K, Bosmann M. The MAVS immune recognition pathway in viral  
408 infection and sepsis. *Antioxid Redox Signal* **2021**; 35:1376–1392.
- 409 28. Loo Y-M, Gale M. Immune signaling by RIG-I-like receptors. *Immunity* **2011**; 34:680–692.
- 410 29. Kumar A, Eby MT, Sinha S, Jasmin A, Chaudhary PM. The ectodermal dysplasia receptor  
411 activates the nuclear factor- $\kappa$ B, JNK, and cell death pathways and binds to ectodysplasin A.  
412 *J Biol Chem* **2001**; 276:2668–2677.
- 413 30. Sisto M, Barca A, Lofrumento DD, Lisi S. Downstream activation of NF- $\kappa$ B in the  
414 EDA-A1/EDAR signalling in Sjögren’s syndrome and its regulation by the ubiquitin-editing  
415 enzyme A20. *Clin Exp Immunol* **2016**; 184:183–196.
- 416 31. Tangye SG. XLP: Clinical features and molecular etiology due to mutations in SH2D1A  
417 encoding SAP. *J Clin Immunol* **2014**; 34:772–779.
- 418 32. Baxter SK, Walsh T, Casadei S, et al. Molecular diagnosis of childhood immune  
419 dysregulation, polyendocrinopathy and enteropathy, and implications for clinical  
420 management. *J Allergy Clin Immunol* **2022**; 149:327–339.
- 421 33. Schreeder DM, Cannon JP, Wu J, Li R, Shakhmatov MA, Davis RS. FCRL6 is an MHC  
422 class II receptor. *J Immunol* **2010**; 185:23–27.
- 423 34. Adam Alexandersson, Mikko S Venäläinen, Nelli Heikkilä, et al. Proteomics screening post  
424 pediatric allogeneic hematopoietic stem cell transplantation reveals an association between  
425 increased expression of inhibitory receptor FCRL6 on  $\gamma\delta$  T cells and CMV reactivation.  
426 *medRxiv* **2023**; :2023.11.02.23297952.
- 427 35. Sun S-C. The non-canonical NF- $\kappa$ B pathway in immunity and inflammation. *Nat Rev*  
428 *Immunol* **2017**; 17:545–558.
- 429 36. Sylla BS, Murphy K, Cahir-McFarland E, Lane WS, Mosialos G, Kieff E. The X-linked  
430 lymphoproliferative syndrome gene product SH2D1A associates with p62dok (Dok1) and

- 431 activates NF- $\kappa$ B. *Proc Natl Acad Sci U S A* **2000**; 97:7470–7475.
- 432 37. Liu P, Li Y, Wang W, et al. Role and mechanisms of the NF- $\kappa$ B signaling pathway in various  
433 developmental processes. *Biomed Pharmacother* **2022**; 153:113513.
- 434 38. Cui X, Zhang X, Xue J, Yao Y, Zhou D, Cheng Z. TMT-based proteomic analysis reveals  
435 integrins involved in the synergistic infection of reticuloendotheliosis virus and avian  
436 leukosis virus subgroup J. *BMC Vet Res* **2022**; 18:131.
- 437 39. Hussein HAM, Walker LR, Abdel-Raouf UM, Desouky SA, Montasser AKM, Akula SM.  
438 Beyond RGD: virus interactions with integrins. *Arch Virol* **2015**; 160:2669–2681.
- 439 40. McGue M, Osler M, Christensen K. Causal inference and observational research: the utility  
440 of twins. *Perspect Psychol Sci* **2010**; 5:546–556.
- 441

442 **FIGURE LEGENDS**

443

444 **Figure 1. Flow chart of inclusion and exclusion of the study population**

445

446 **Figure 2. Differentially expressed proteins between neonates with and without**  
447 **infection**

448 FC: fold change values, calculated as the ratio of the means of the normalized protein  
449 expression values (case/control). Volcanic plot was used to present the results, in  
450 which between-group comparison of levels of proteins showing a  $P < 0.05$   
451 ( $-\log_{10}P > 1.30$ ) from Wilcoxon rank-sum test were defined as differentially expressed  
452 proteins.

453

454 **Figure 3. Associations between multiple immune-response-related proteins and**  
455 **neonatal infection**

456 A. In all twins (n=149); B. In discordant twin pairs (n=68, 34 pairs). Forest plot was  
457 used to present odds ratio (OR) and 95% confidence interval (CI) from multivariable  
458 logistic regression (A) and multivariable conditional logistic regression (B).

459

460 **Figure 4. Prediction of differentially expressed proteins for neonatal infection**

461 AUC: Area under the curve.

462

463 **Figure 5. Enrichment analyses for the differentially expressed proteins**

464 A. Bar plot of the Gene Ontology (GO) enrichment; B. Network plot of the GO  
465 enrichment; C. Bar plot of the Kyoto Encyclopedia of Genes and Genomes (KEGG)  
466 enrichment.

467

468

469

470

471



**Table 1: Maternal and neonatal characteristics comparing between twins without and with neonatal infection (in 149 twins, including 34 pairs of discordant twins)**

| Characteristics                                       | Twins without neonatal infection | Twins with neonatal infection | <i>P</i> <sup>a</sup> |
|-------------------------------------------------------|----------------------------------|-------------------------------|-----------------------|
| <b>All twins<sup>b</sup>, n (%)</b>                   | 89 (59.73)                       | 60 (40.27)                    |                       |
| <b>Maternal characteristics</b>                       |                                  |                               |                       |
| <b>Age at delivery (years), mean±SD</b>               | 32.42±4.11                       | 31.47±3.96                    | 0.160 <sup>c</sup>    |
| <25, n (%)                                            | 1 (1.12)                         | 3 (5.00)                      |                       |
| 25-29, n (%)                                          | 28 (31.46)                       | 17 (28.33)                    |                       |
| 30-34, n (%)                                          | 39 (43.82)                       | 30 (50.00)                    | 0.355                 |
| ≥35, n (%)                                            | 21 (23.60)                       | 10 (16.67)                    |                       |
| <b>Educational level, n (%)</b>                       |                                  |                               |                       |
| Junior high school and below                          | 15 (16.85)                       | 7 (11.67)                     |                       |
| Senior high/Vocational school                         | 16 (17.98)                       | 10 (16.67)                    | 0.634                 |
| University and above                                  | 58 (65.17)                       | 43 (71.67)                    |                       |
| <b>Pre-pregnancy BMI, mean±SD</b>                     | 21.24±3.04                       | 22.29±3.22                    | 0.048 <sup>c</sup>    |
| <18.5, n (%)                                          | 16 (17.98)                       | 3 (5.00)                      |                       |
| 18.5-23.9, n (%)                                      | 55 (61.80)                       | 43 (71.67)                    |                       |
| 24-27.9, n (%)                                        | 15 (16.85)                       | 11(18.13)                     | 0.226                 |
| ≥28, n (%)                                            | 3 (3.37)                         | 3 (5.00)                      |                       |
| <b>Mode of conception, n (%)</b>                      |                                  |                               |                       |
| Naturally conceived                                   | 37 (41.57)                       | 33 (55.00)                    | 0.149                 |
| IVF-ET                                                | 52 (58.43)                       | 27 (45.00)                    |                       |
| <b>Gravidity, n (%)</b>                               |                                  |                               |                       |
| 1                                                     | 40 (44.94)                       | 20 (33.33)                    |                       |
| 2                                                     | 23 (25.84)                       | 22 (36.67)                    | 0.273                 |
| ≥3                                                    | 26 (29.21)                       | 18 (30.00)                    |                       |
| <b>Vaginal bleeding during early pregnancy, n (%)</b> |                                  |                               |                       |
| No                                                    | 75 (84.27)                       | 45 (75.00)                    | 0.234                 |
| Yes                                                   | 14 (15.73)                       | 15 (25.00)                    |                       |
| <b>Diabetes, n (%)</b>                                |                                  |                               |                       |
| No                                                    | 49 (55.06)                       | 40 (66.67)                    |                       |
| Pregestational diabetes                               | 0 (0.00)                         | 0 (0.00)                      | 0.212                 |
| Gestational diabetes                                  | 40 (44.94)                       | 20 (33.33)                    |                       |
| <b>Hypertension, n (%)</b>                            |                                  |                               |                       |
| No                                                    | 65 (73.03)                       | 41 (68.33)                    |                       |
| Pregestational hypertension                           | 0 (0.00)                         | 0 (0.00)                      | 0.662                 |
| Gestational hypertension                              | 24 (26.97)                       | 19 (31.67)                    |                       |
| <b>Autoimmune diseases, n (%)</b>                     |                                  |                               |                       |
| No                                                    | 85 (95.51)                       | 58 (96.67)                    | >0.999                |
| Yes                                                   | 4 (4.49)                         | 2 (3.33)                      |                       |
| <b>Gestational age (weeks),</b>                       | 36.44±1.07                       | 36.26±1.28                    | 0.387 <sup>c</sup>    |

|                                            |             |             |                     |
|--------------------------------------------|-------------|-------------|---------------------|
| <b>mean±SD</b>                             |             |             |                     |
| <34 <sup>+0</sup> , n (%)                  | 2 (2.25)    | 3 (5.00)    |                     |
| 34 <sup>+0</sup> -36 <sup>+6</sup> , n (%) | 48 (53.93)  | 32 (53.33)  | 0.654               |
| 37 <sup>+0</sup> -38 <sup>+6</sup> , n (%) | 39 (43.82)  | 25 (41.67)  |                     |
| ≥39 <sup>+0</sup> , n (%)                  | 0 (0.00)    | 0 (0.00)    |                     |
| <b>Neonatal characteristics</b>            |             |             |                     |
| <b>Sex, n (%)</b>                          |             |             |                     |
| Male                                       | 43 (48.31)  | 33 (55.00)  | 0.526               |
| Female                                     | 46 (51.69)  | 27 (45.00)  |                     |
| <b>Birth weight (grams), mean±SD</b>       |             |             |                     |
| <2000, n (%)                               | 22 (24.72)  | 6 (10.00)   | 0.054 <sup>c</sup>  |
| 2000-2499, n (%)                           | 29 (32.58)  | 16 (26.67)  | 0.281               |
| 2500-2999, n (%)                           | 33 (37.08)  | 34 (56.67)  |                     |
| ≥3000, n (%)                               | 5 (5.62)    | 4 (6.67)    |                     |
| <b>Discordant twins<sup>b</sup>, n (%)</b> |             |             |                     |
|                                            | 34 (50.00%) | 34 (50.00%) |                     |
| <b>Sex, n (%)</b>                          |             |             |                     |
| Male                                       | 18 (52.94)  | 17 (50.00)  | >0.999 <sup>a</sup> |
| Female                                     | 16 (47.06)  | 17 (50.00)  |                     |
| <b>Birth weight (grams), mean±SD</b>       |             |             |                     |
| <2000, n (%)                               | 6 (17.65)   | 2 (5.88)    | 0.046 <sup>d</sup>  |
| 2000-2499, n (%)                           | 13 (38.24)  | 9 (26.47)   | 0.486 <sup>e</sup>  |
| 2500-2999, n (%)                           | 13 (38.24)  | 19 (55.88)  |                     |
| ≥3000, n (%)                               | 2 (5.88)    | 4 (11.76)   |                     |

Abbreviations: SD, standard deviation; IVF-ET, In vitro fertilization and embryo transfer.

<sup>a</sup> Pearson's Chi-squared test or Fisher's exact test unless stated otherwise;

<sup>b</sup> Row percentage;

<sup>c</sup> Independent sample t-test;

<sup>d</sup> Paired sample t-test;

<sup>e</sup> Wilcoxon signed-rank test.

**Twins in the Shenzhen Baoan Birth & Twin (SZBBTwin) cohort** from May 5th, 2020 to Feb 6th, 2023 (N=704)

N=4

Exclusion of twins without cord blood samples

**Twin neonates with cord blood samples (N=700)**

**Yes**

N=60

**Neonatal Infection**

(0-27 days)

**No**

N=640

**Cases**  
(N=60)

**Match**

1) Discordant twin pairs

N=34

2) Sex and age (< 30 days)

N=65

**Controls**  
(N=99)

**92 Immune-response-related proteins in cord plasma**

Proximity extension assay from Olink Proteomics platform

N=0

Exclusion of warning samples

N=10

**Cases**  
(N=60)

**Nested case-control study**

**Controls**  
(N=89)

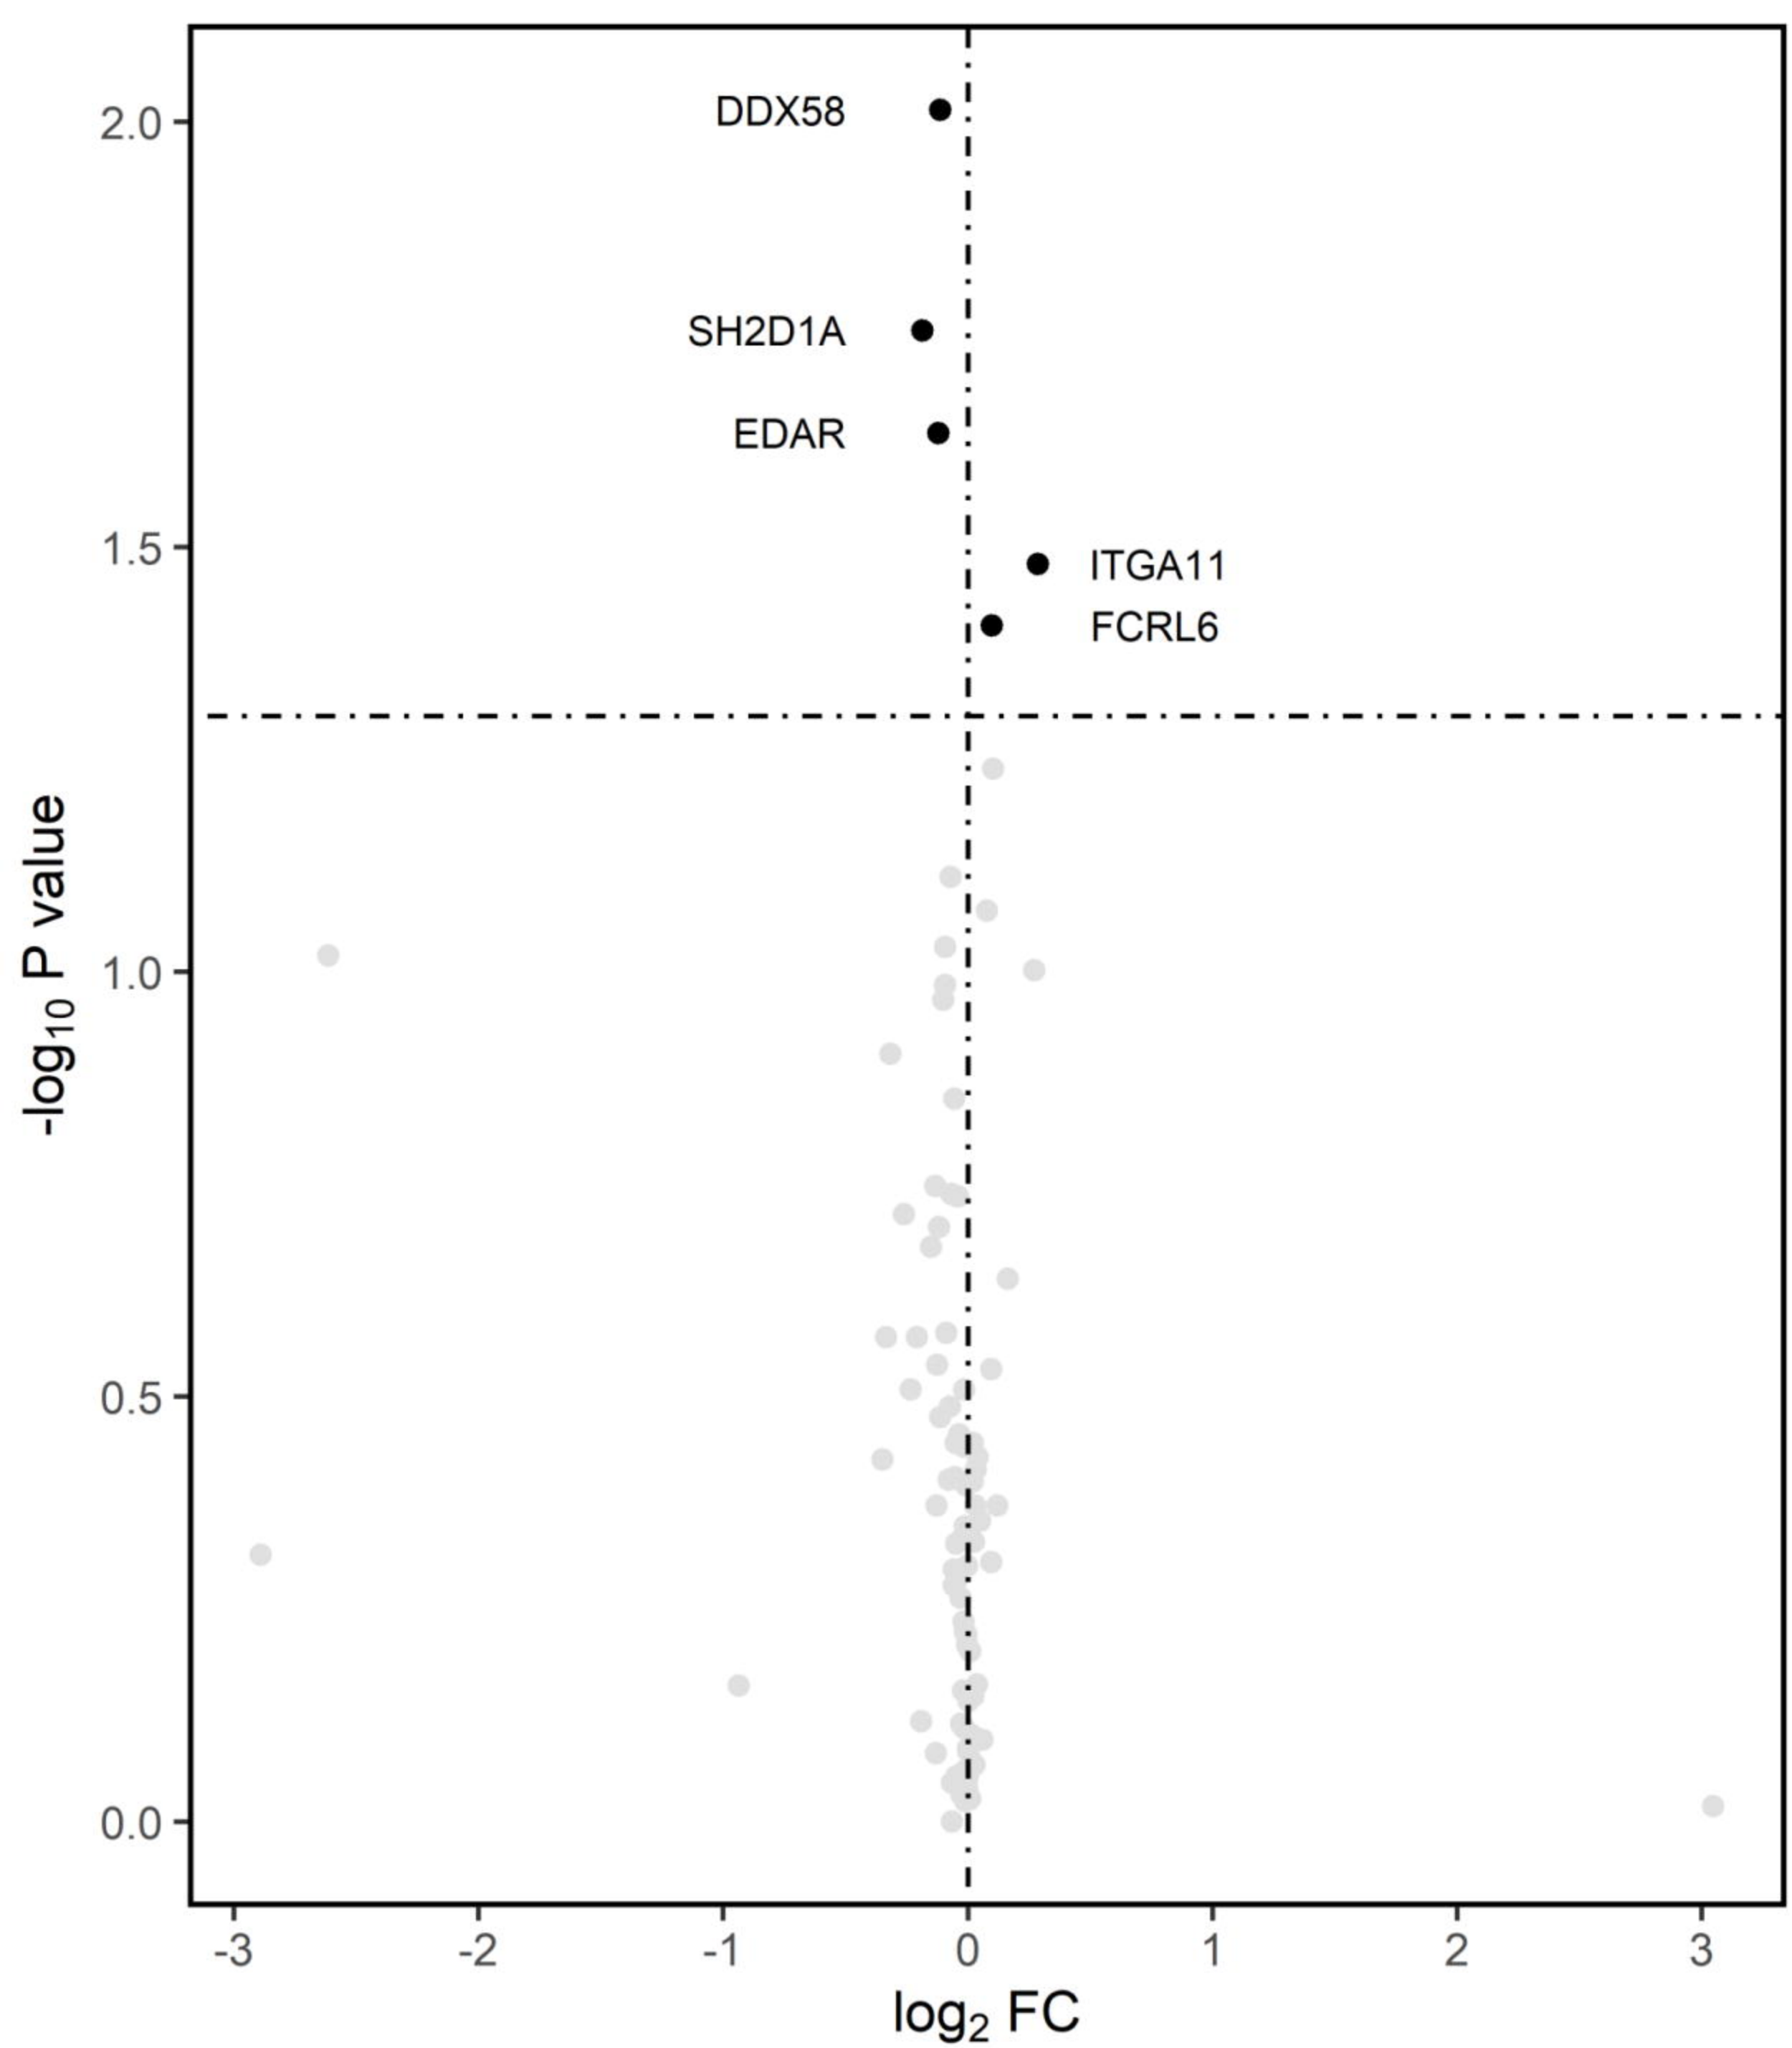

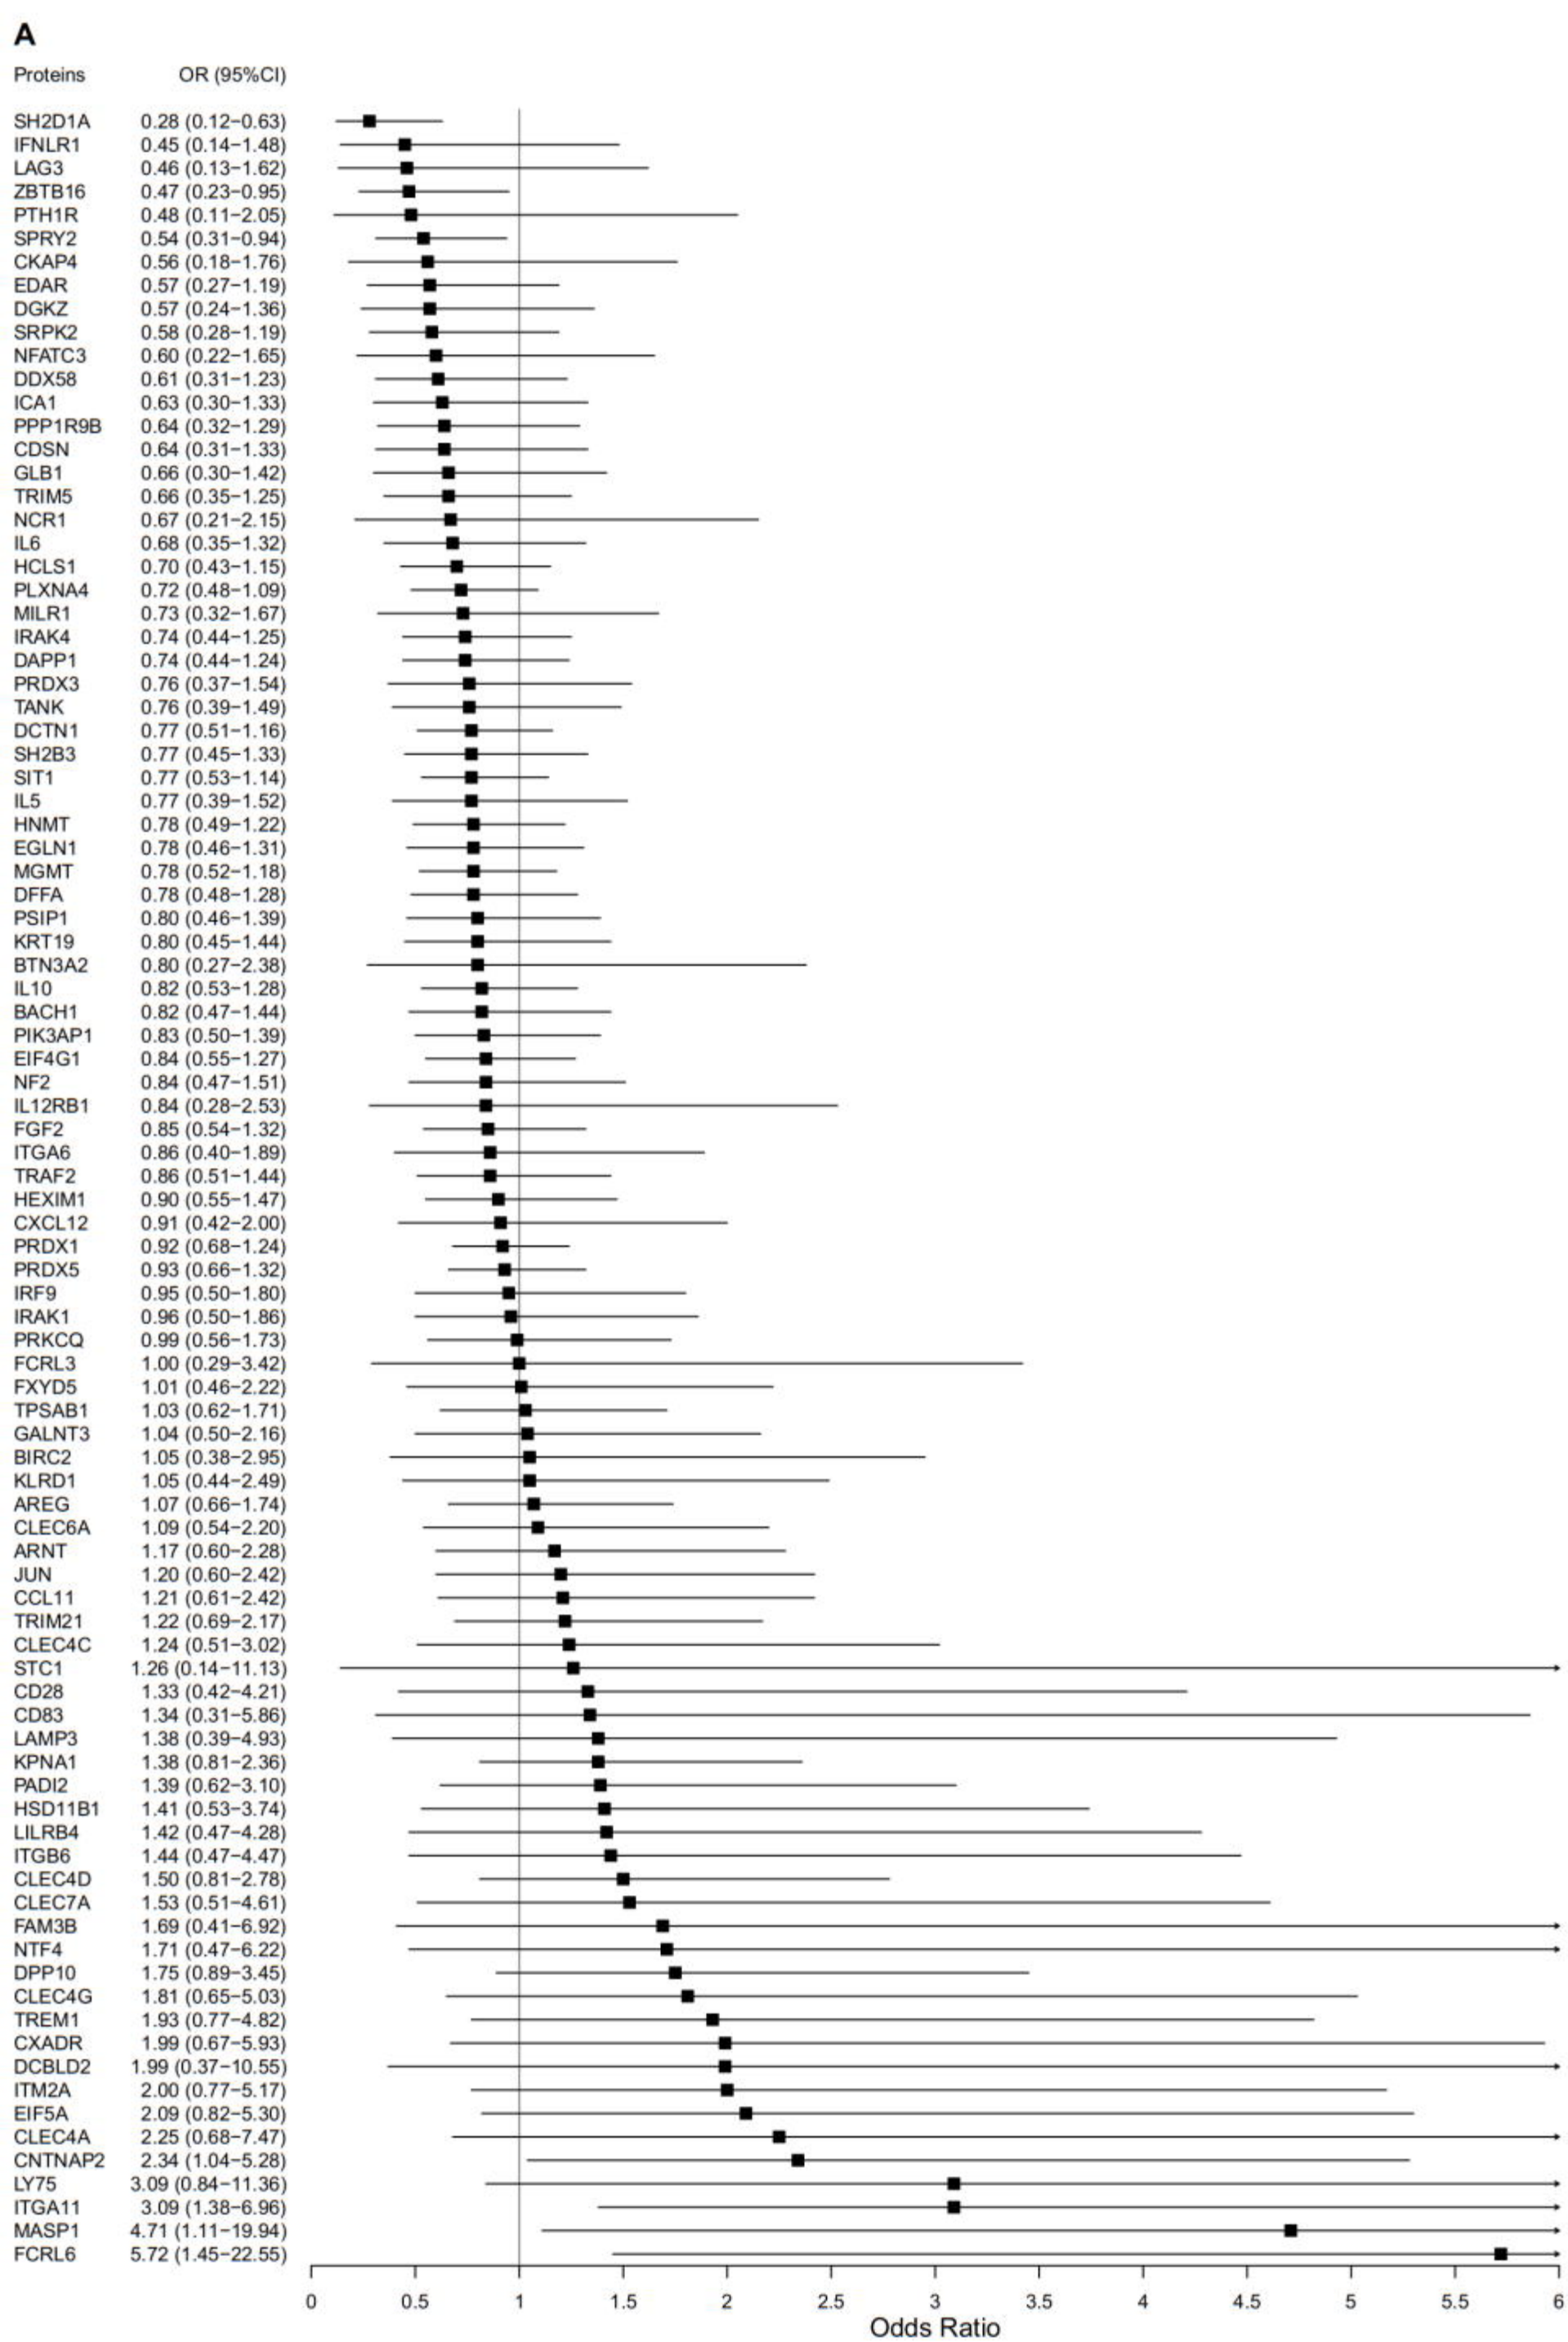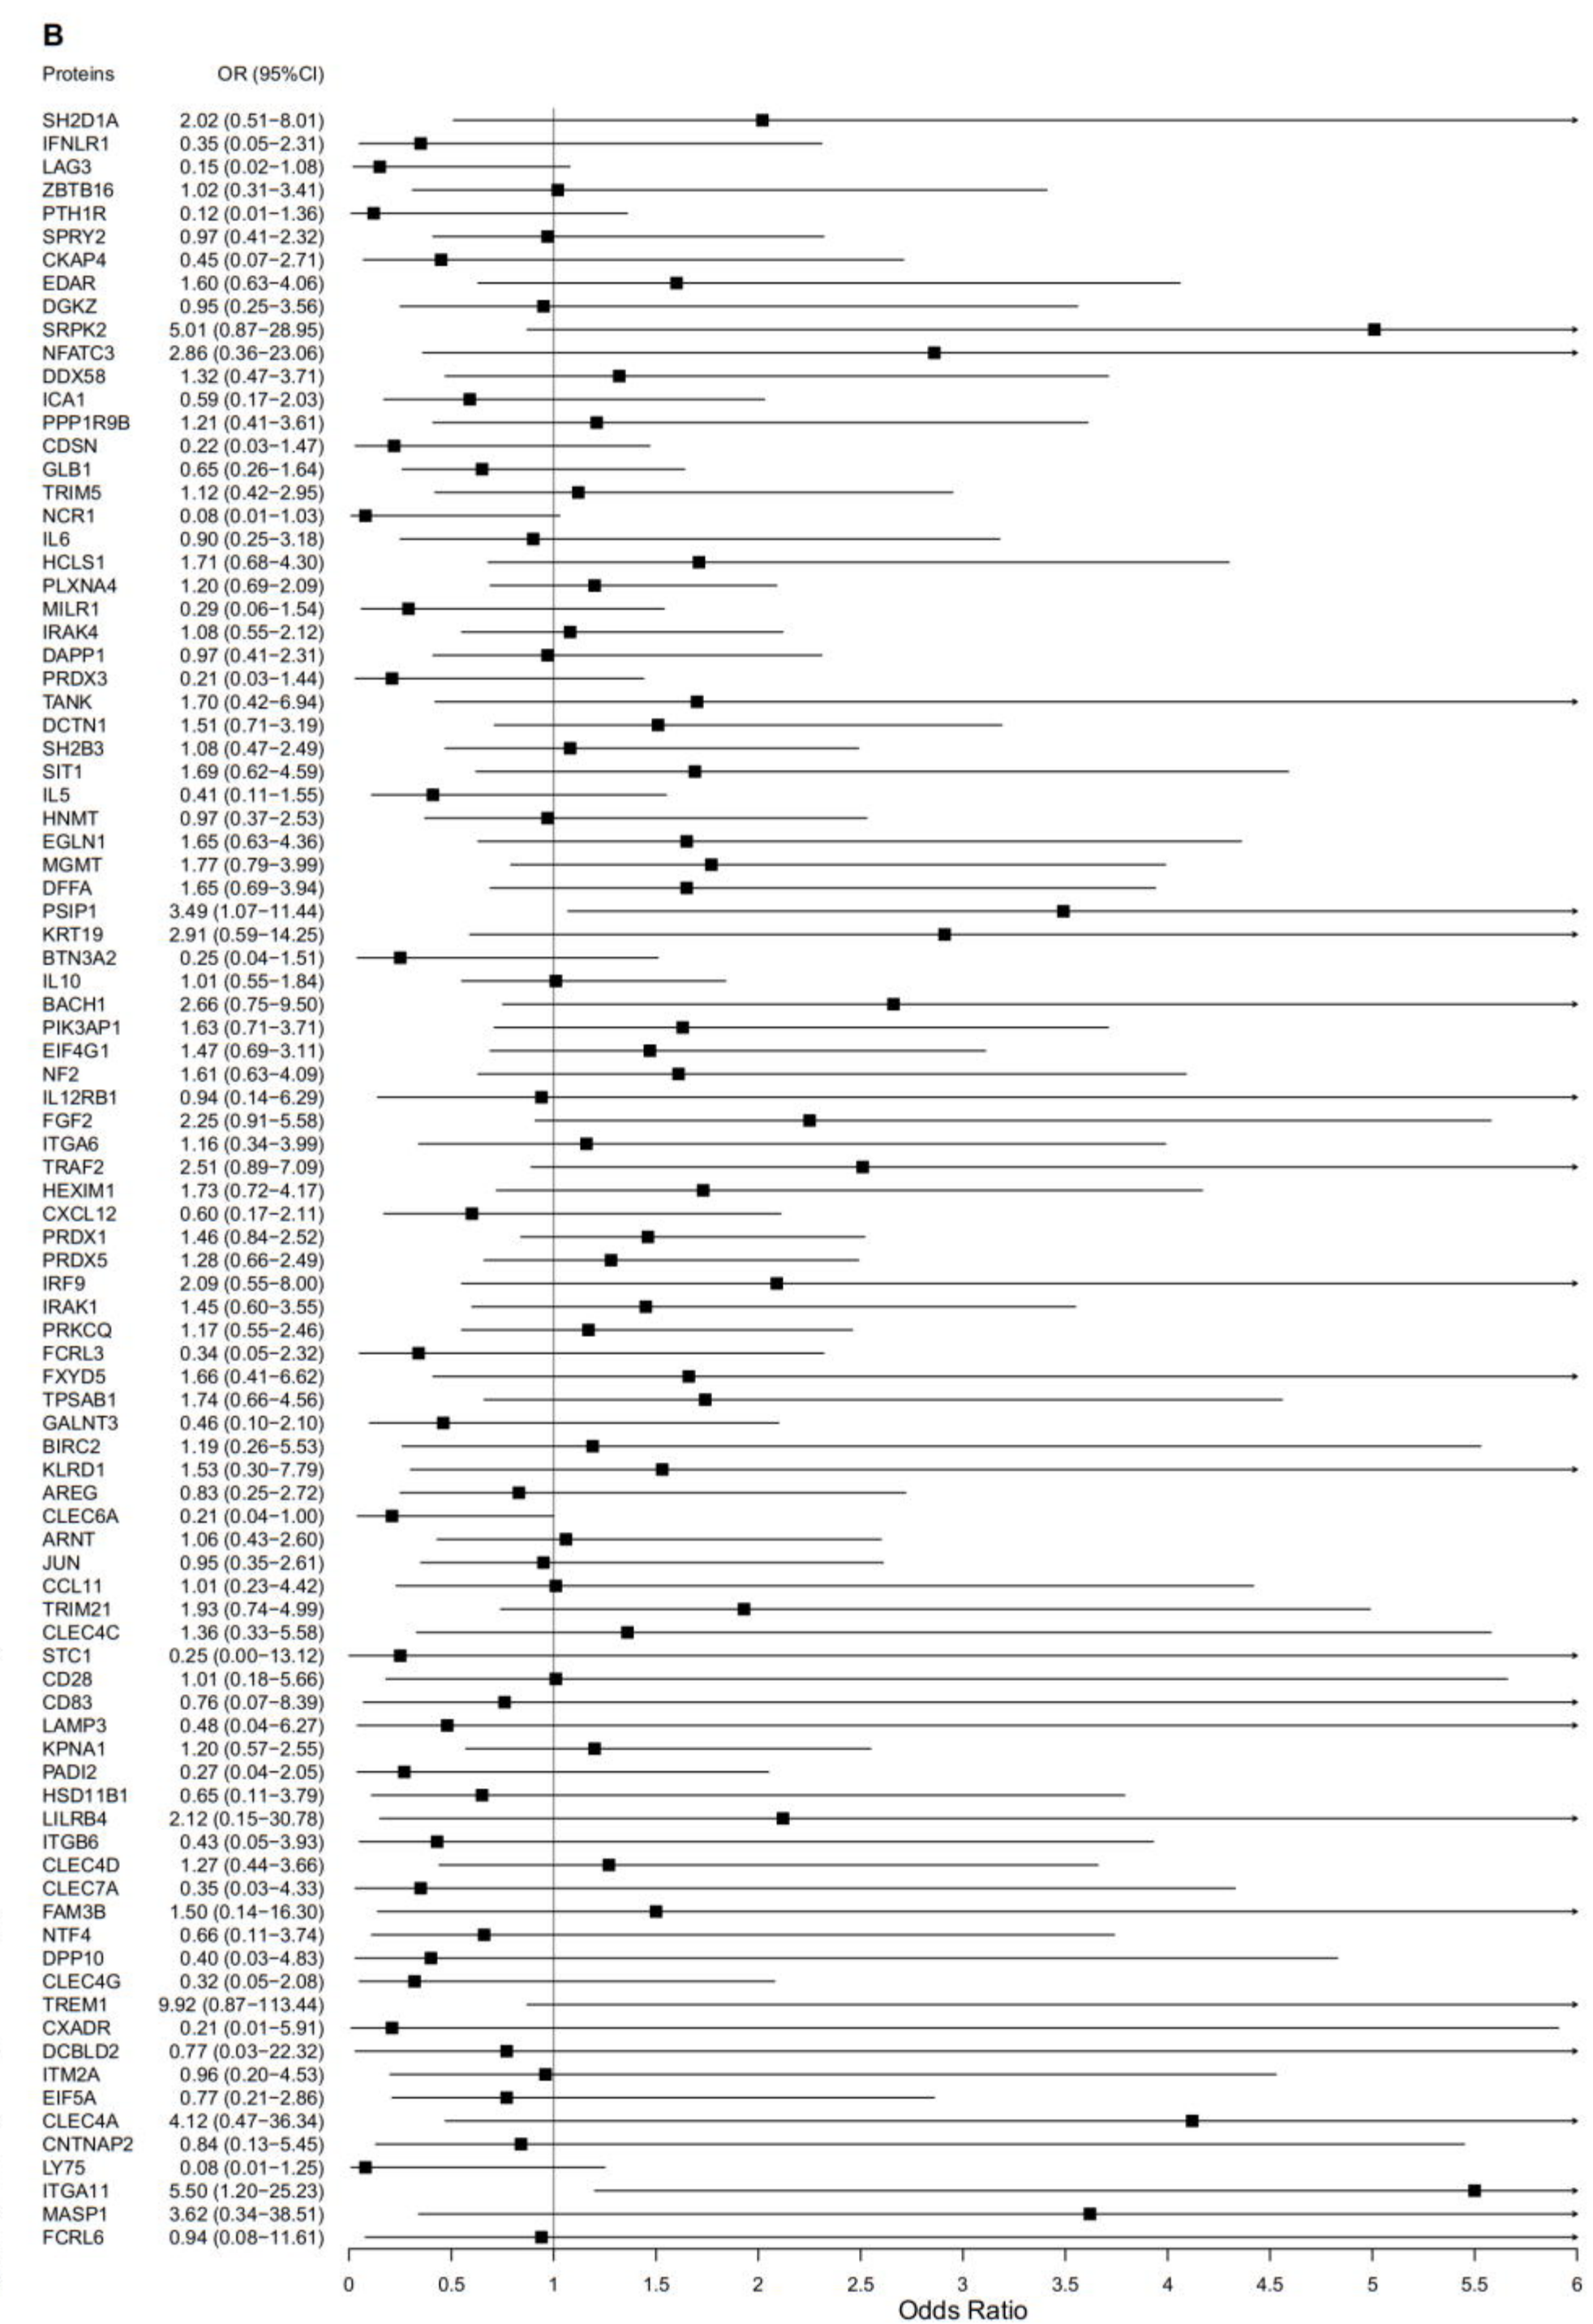

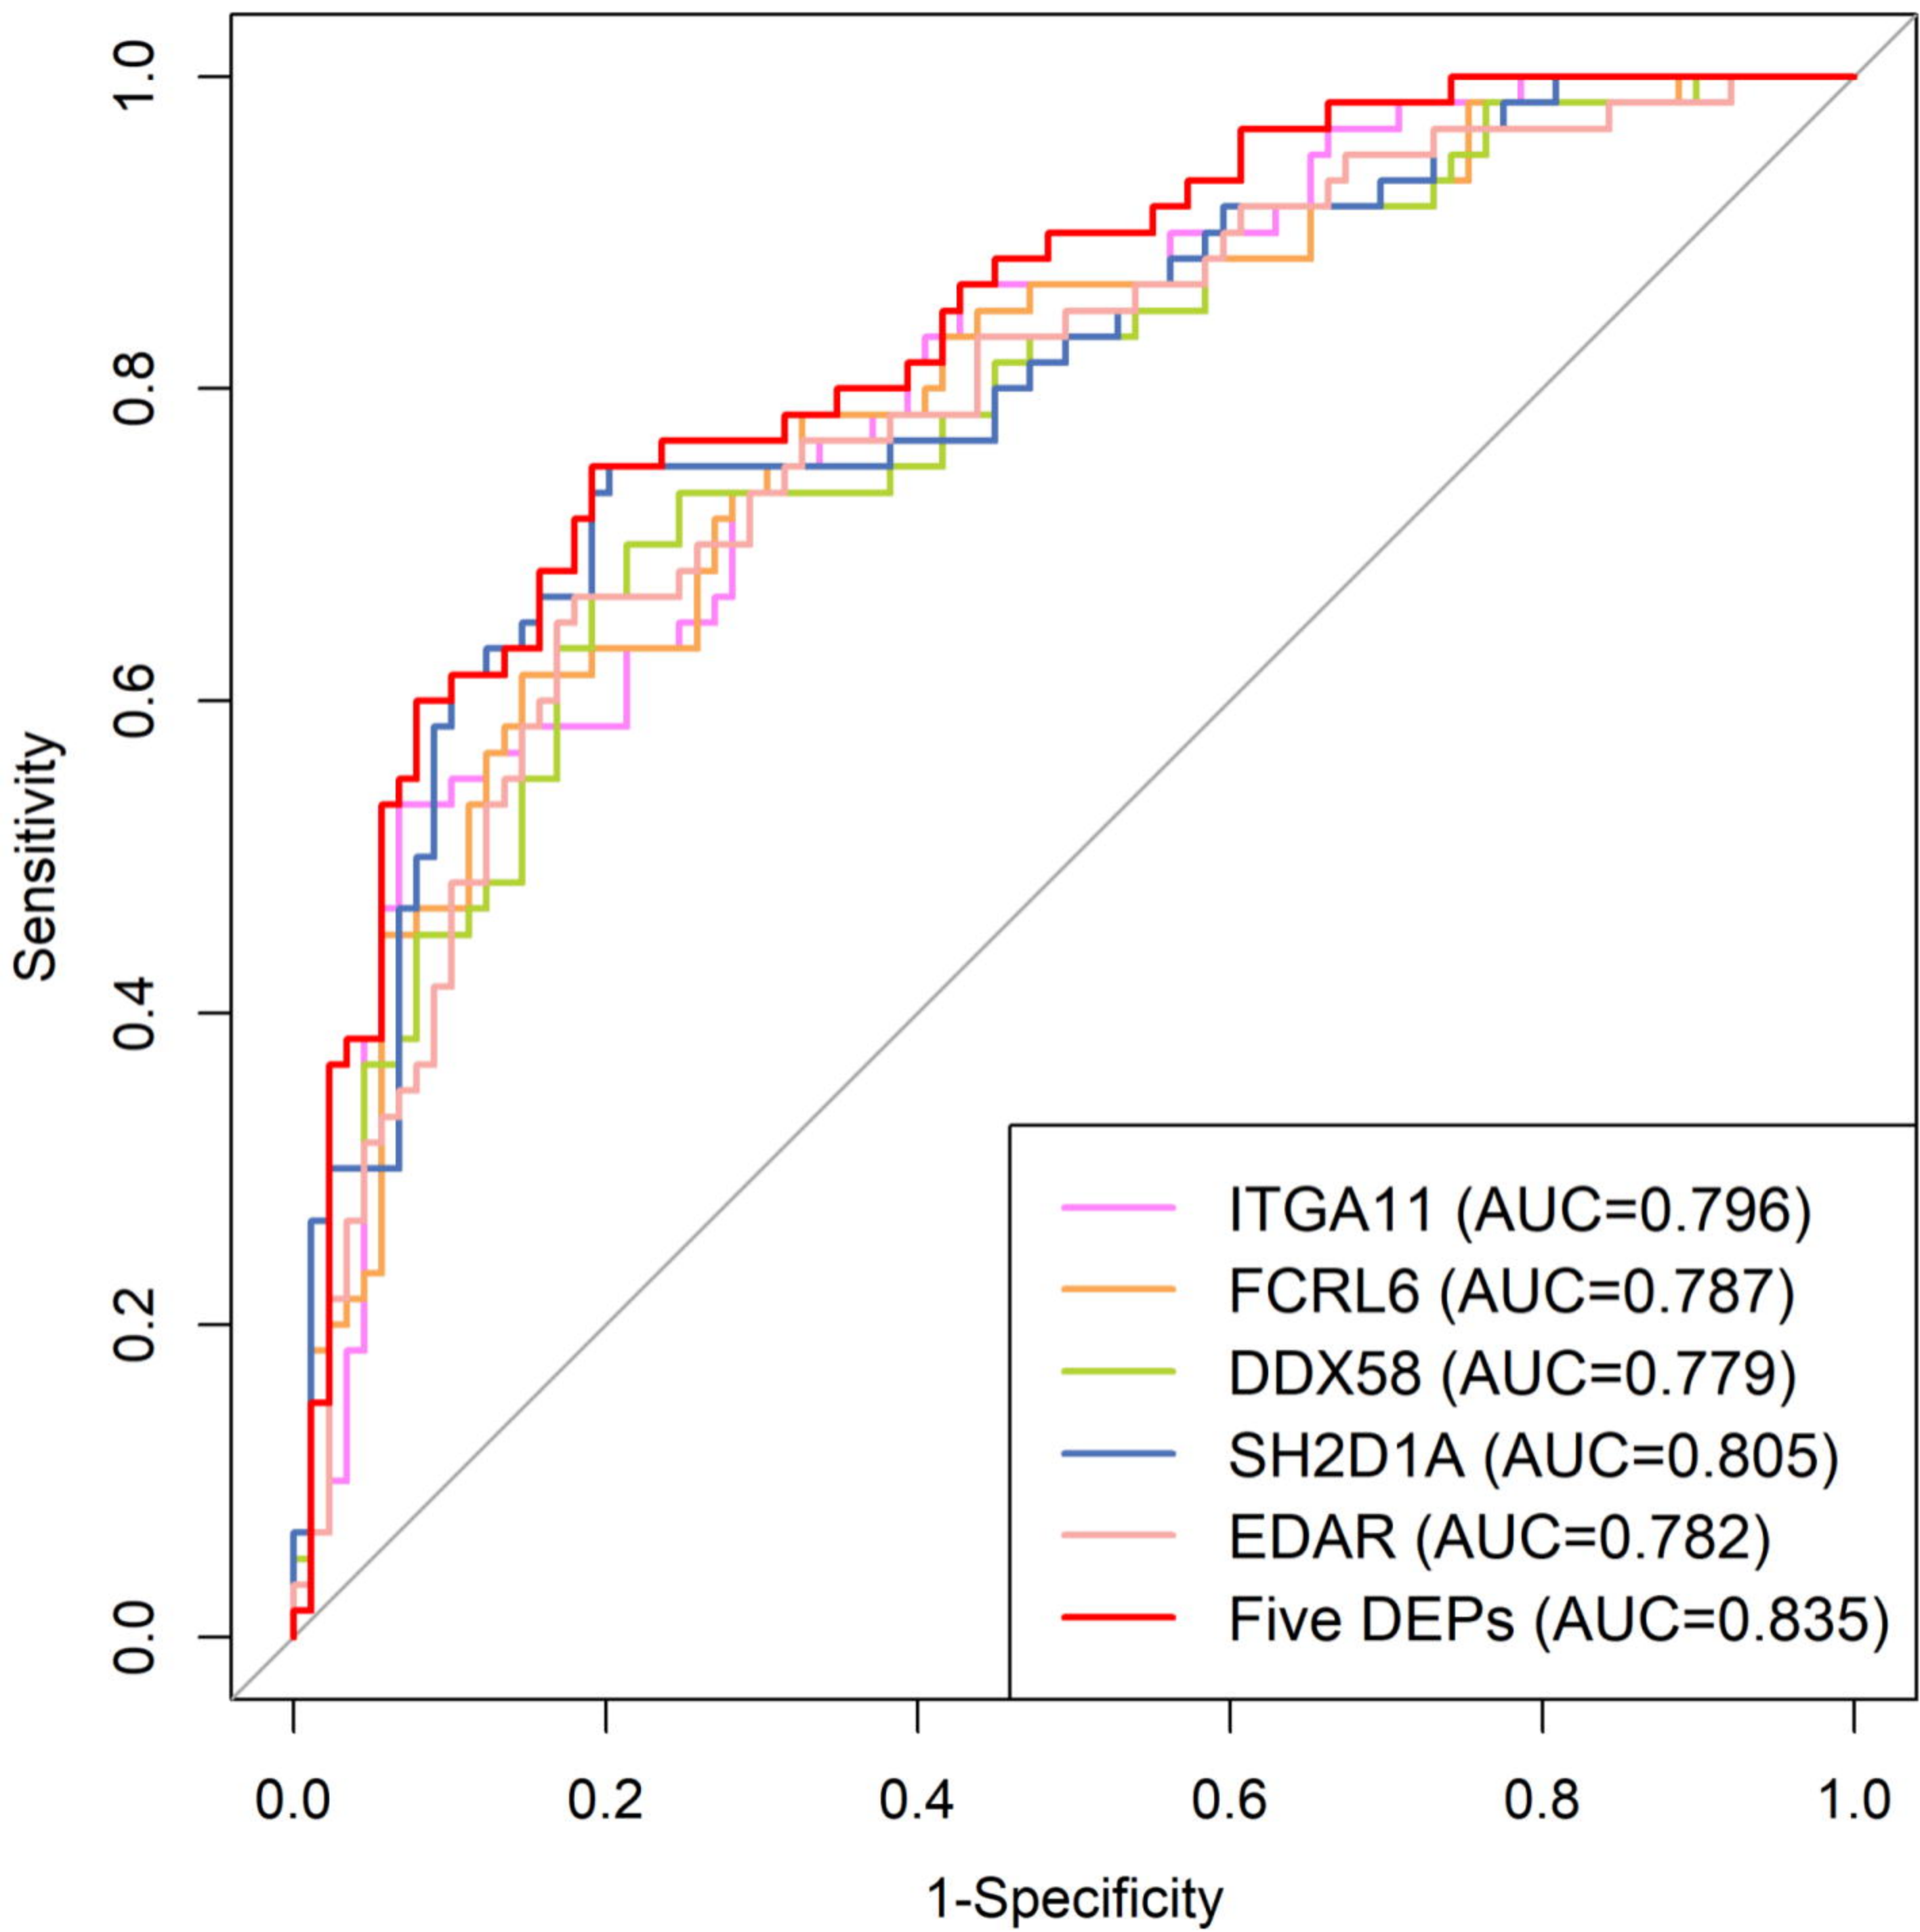

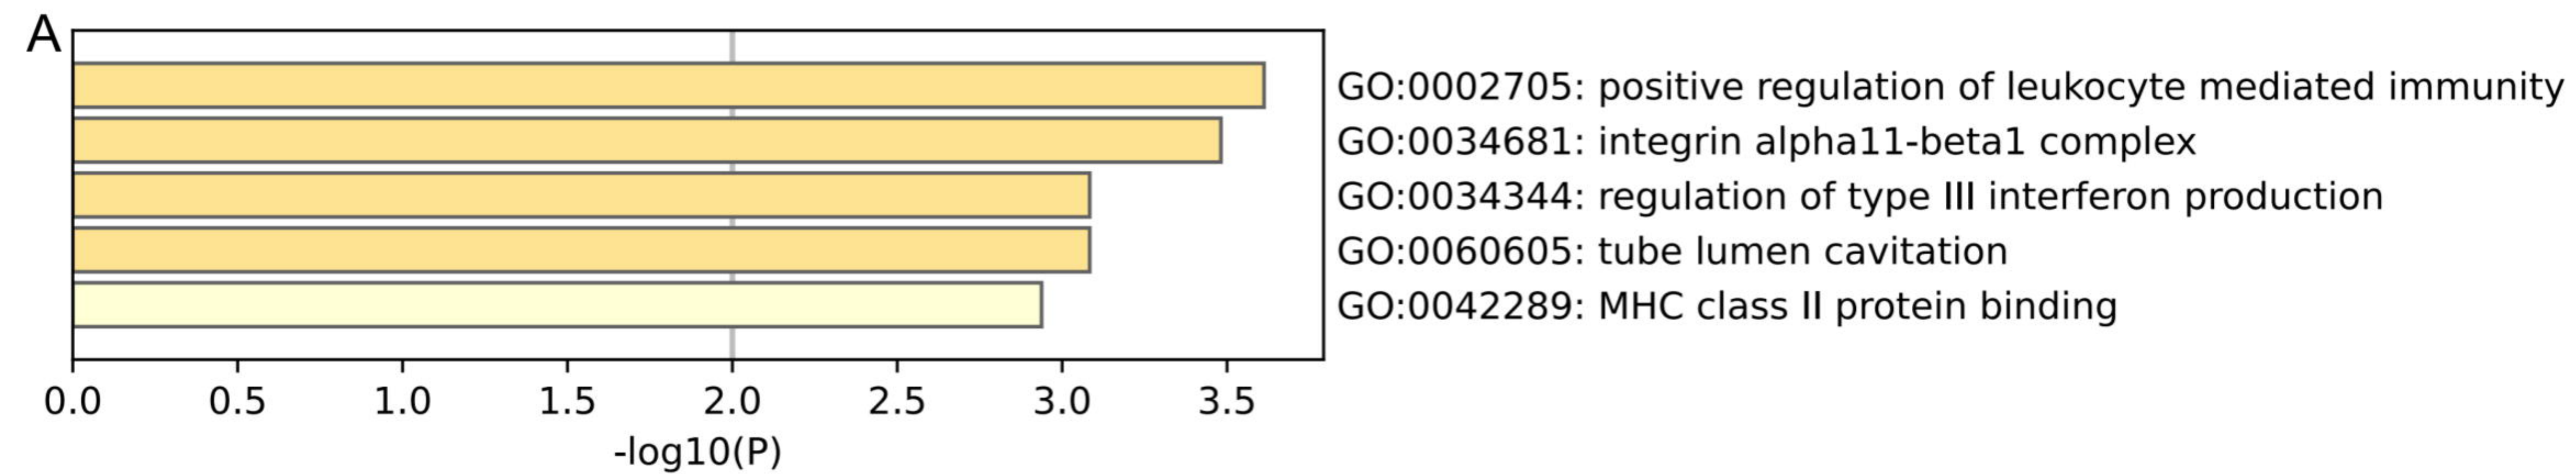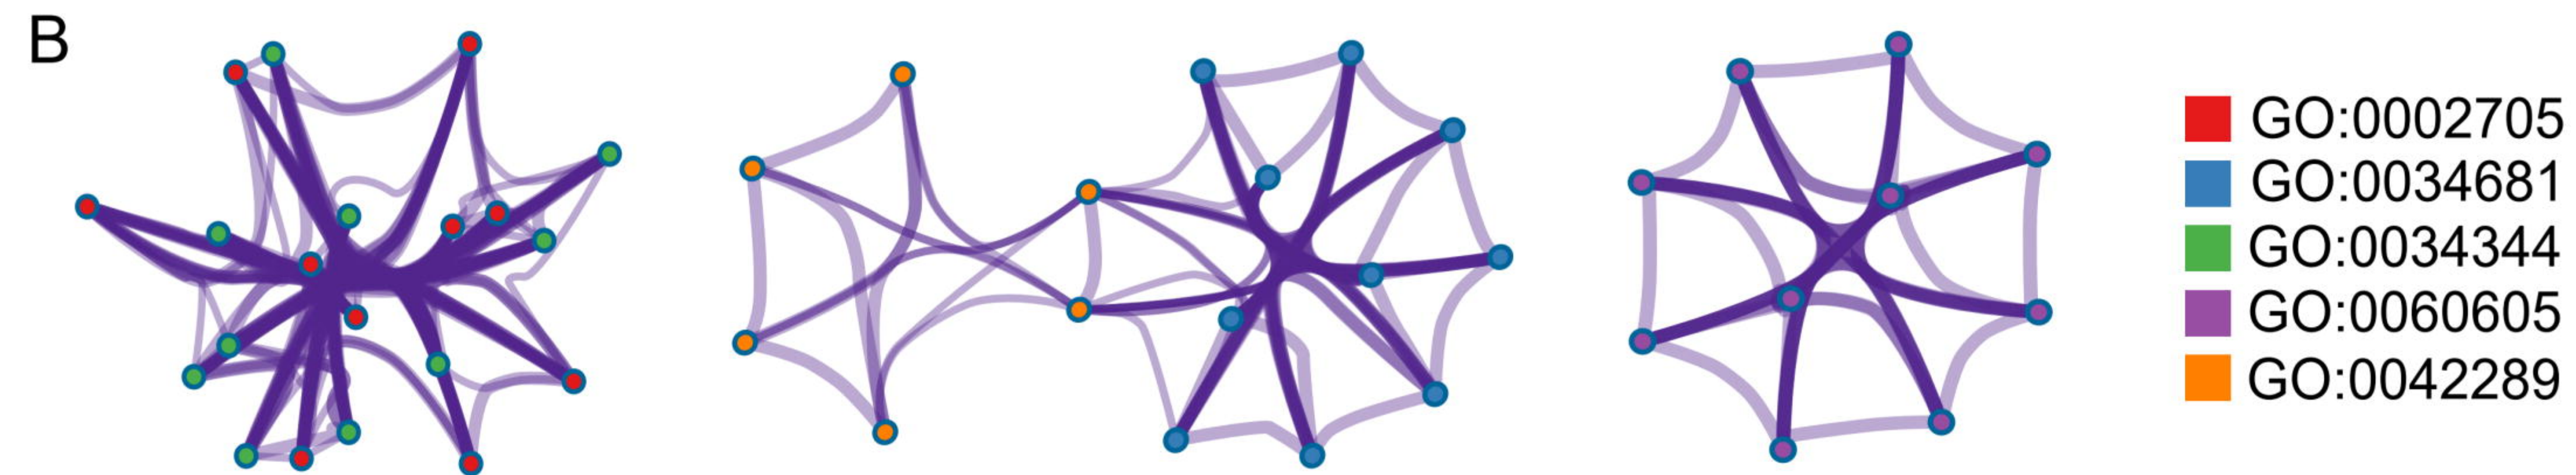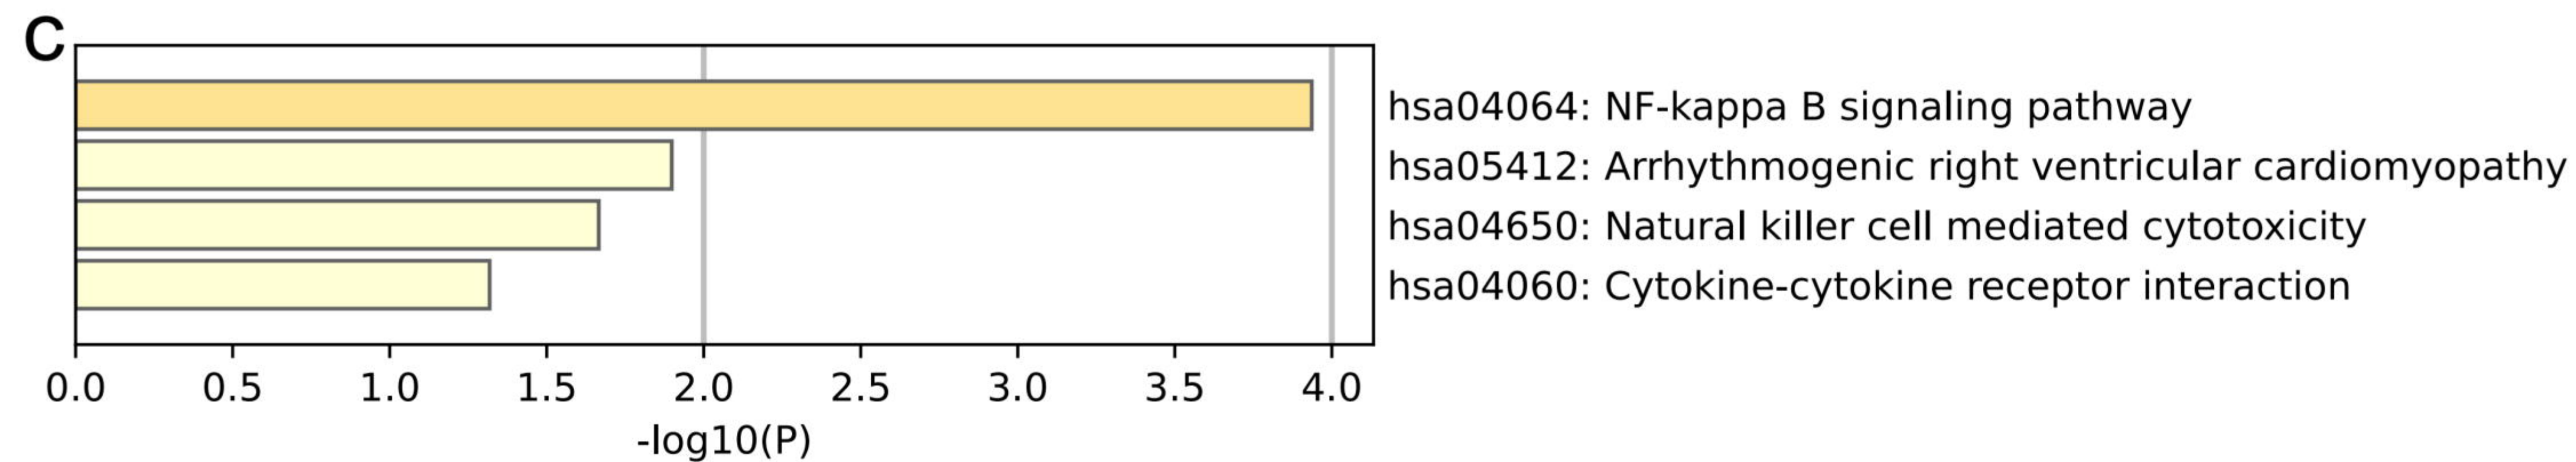

Source: https://www.medrxiv.org/content/10.1101/2024.02.14.24302852v1.full.pdf
